# Supplementary material for: Abnormal thyroid hormone metabolism in mice lacking the monocarboxylate transporter 8
Source: JCI journal article supplement (doi:10.1172/jci28253), 2007-02-22
Supplement: sd1 [file 1]

**Cerebellum**

**PCL**

**A**

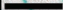

**Striatum**

**CPu**

**B**

**Hypothalamus**

**PVN**

**C**

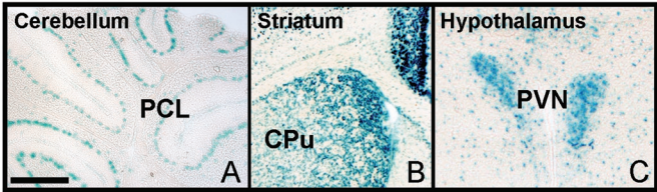

**A****D2 activity in pituitary**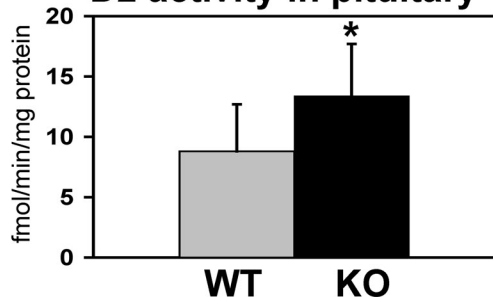**B****serum TSH (ng/ml)**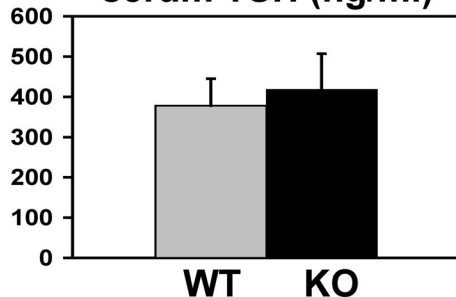**C****qPCR analysis (pituitary)**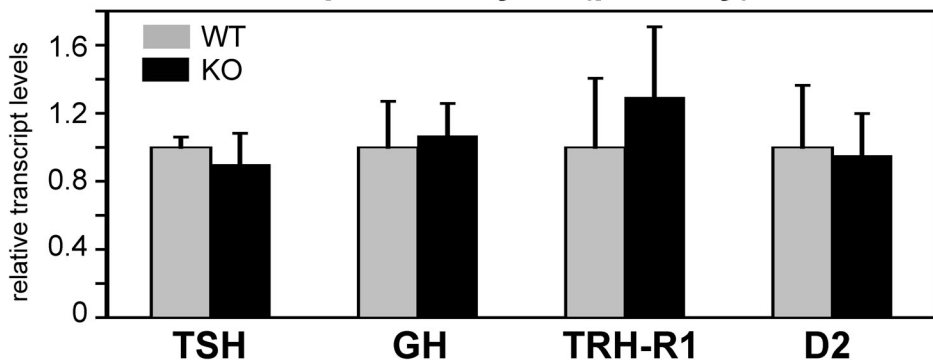

## Supplementary Figures

**Supplemental Figure 1. LacZ expression pattern in the hypothalamus, striatum and cerebellum of MCT8 null mice.** As demonstrated by lacZ staining, Purkinje cells in the cerebellum are clearly positive for  $\beta$  galactosidase activity in MCT8 null mice (A). High levels of  $\beta$  galactosidase activities are also found in cells throughout the striatum (CPu) (B) as well as in neurons of the paraventricular hypothalamic nucleus (PVN) (C). Scale bar in A: 100  $\mu\text{m}$  (for A) 40  $\mu\text{m}$  (for B), 20  $\mu\text{m}$  (for C).

**Supplemental Figure 2. Analysis of the thyroidal state in pituitaries of MCT8 null mice.**

- A. D2 activities were found to be increased in MCT8 null mice by a factor of 1.5.
- B. TSH serum levels did not differ between wild type mice and MCT8 deficient animals.
- C. As analysed by quantitative real-time PCR transcript levels of T3 regulated genes (TSH, GH, TRH-R1, D2) in the pituitary of MCT8 null mice were comparable to those detected in controls.
